# Supplementary material for: Climatic niche of Selinum alatum (Apiaceae, Selineae), a new invasive plant species in Central Europe and its alterations according to the climate change scenarios: Are the European mountains threatened by invasion?
Source: PLoS One. 2017 Aug 14;12(8):e0182793. doi: 10.1371/journal.pone.0182793 (PMC5555634; doi:10.1371/journal.pone.0182793)
Supplement: S1 Table — (DOCX) [file pone.0182793.s001.docx]

**Appendix 1**

**Title**: Climatic niche of *Selinum alatum* (Apiaceae, Selineae), a new invasive plant species in Central Europe and its alterations according to the climate change scenarios: are the European mountains threatened by invasion?

**Authors**: Kamil Konowalik1*, Małgorzata Proćków2, Jarosław Proćków1

1Department of Plant Biology, Institute of Biology, Wrocław University of Environmental and Life Sciences, Kożuchowska 5b, 51-631 Wrocław, Poland

2Museum of Natural History, University of Wrocław, Sienkiewicza 21, 50-335 Wrocław, Poland

* author for correspondence: e-mail: kamil.konowalik@up.wroc.pl

| **Country** | **Locality** | **Latitude** | **Longitude** |
| --- | --- | --- | --- |
| Georgia | Pirikiti Khevsureti, basin of riv. Arguni, right tributary of the riv. Tergi, near vill. Shatili, the Upper Khonis-Tskali, about 18 km of vill. Shatili, Georgia, 45.23963, 42.57553 , Elevation: 2 121m ± 0m | 42.57553 | 45.23963 |
| Georgia | Lagodekhi Nature Reserve. Along the ridgetop and south-facing slope south of the meteorological station (“Meteo Sta.”) and field cabin, and south of the main trail from Lagodekhi to Meteo Station, from about 41052’13” N, 46021’31”E, southwest along the ridge to a point about 41052’00” N, 46021’00”E, from about 2100-2200 m elevation | 41.87028 | 46.35861 |
| Turkey | Vallee de Djimil [Cimil vadi near İkizdere] (Lazistan) | 40.78874 | 40.58833 |
| Turkey | [B2 Izmir] in Tmolo [= Bozdağ] supra Philadelphiam, *Boissier* | 38.33937 | 28.07632 |
| Turkey | [Bl Manisa] Sypilo [=Sipylus] (Manisa Da.[Dağı]), *Aucher 3605*. | 38.56722 | 27.45472 |
| Turkey | A2(A) Bursa: nr. Broussa (Bursa), Pichler 1874:32! | 40.18333 | 29.05000 |
| Turkey | A3 Zonguldak: 4-5 km E. of Zonguldak, 10 m, *D. 37585!* | 41.45211 | 31.85228 |
| Turkey | A4 Kastamonu: Inebolu, s.l., *D. 21719!* | 41.97158 | 33.76345 |
| Turkey | A5 Amasya: Amasya, *Bornm.* | 40.65018 | 35.83649 |
| Turkey | A7 Giresun: Yavuzkemal, *D. 20747!* | 40.63960 | 38.32114 |
| Turkey | A8 Trabzon: N. slope of Soğanli Da. above Çaykara, 1300 m, *D. 32088!* | 40.57146 | 40.22973 |
| Turkey | Rize: nr. [near] Djimil (Cimil), 1829 m, *Bal.* (type of H. spathyphyllum). | 40.73920 | 40.72408 |
| Turkey | Bl Balikesir: Mt. Ida (Kaz Da.), *Sint. 1883:612!* | 39.70000 | 26.83333 |
| Turkey | B2 Izmir: d. Ödemiş, Boz Da., *Sorger 68-16-121!* | 38.32828 | 28.09987 |
| Turkey | Kütahya: Tahtaköprü forest above Domaniç, 1100 m, *D. 36374!* | 39.83490 | 29.64151 |
| Turkey | B3 Konya: Tekke valley nr. [near] Akşehir, 7 vii 1907, *St. Lager!* | 38.34316 | 31.39713 |
| Turkey | B5. Ankara: Kargasekmez, *T. Baytop 13044!* | 40.42917 | 32.66528 |
| Azerbaijan | Garabagh, pr. Lussogorsk [= Lysogorsk = Lisagor] | 39.68360 | 46.65250 |
| Azerbaijan | distr. Khanlar, around Maral-gel | 40.37838 | 46.31009 |
| Azerbaijan | distr. Kuba, in loco Gil [= Hil] | 41.46477 | 48.33728 |
| Azerbaijan | pr. pag. Leze [Laza] | 41.30056 | 48.11204 |
| Azerbaijan | inter pag. Leze et m-tem Shach-dagh | 41.28670 | 48.08463 |
| Turkey | A7 Giresun: below Tamdere, 1600 m, D. 20628! | 40.50880 | 38.35402 |
| Turkey | Trabzon: Hamsiköy, T. Baytop 14224!, 142461 | 40.68394 | 39.47982 |
| Turkey | Gümüşhane: Tempede (Tenbeda) Sint. 1894: 7537! | 40.45000 | 39.38333 |
| Turkey | A8 Trabzon: N. slope of Soğanli Da. above Çaykara, 1600 m, D. 32100! | 40.56550 | 40.22964 |
| Turkey | Rize: d. Ikizdere, Başköy to Cermanin, Y., 2300 m, D. 21026! | 40.73513 | 40.80822 |
| Turkey | Çoruh: nr. Artvin (Grossheim 7: map 110) | 41.07718 | 41.76299 |
| Turkey | Erzurum: Kop Da. pass, 2440 m, Furse 3743! | 40.03672 | 40.50795 |
| Turkey | Çoruh: nr. Imrehav (Grossheim 7: map 110) | 41.28333 | 42.21667 |
| Turkey | Kars: Sarıkamış, 2100 m, D. 32641! | 40.32998 | 42.58043 |
| Turkey | B6 Maraş: d. Göksun, Binboğa Da. N.E. side of Isik Da. 1900 m, D. 20101! | 38.28104 | 36.59939 |
| Turkey | B7 Erzincan: Sipikor Da., Pirinbaghre [Firin-bahçe], Sint. 1890: 3190! | 39.77119 | 39.50893 |
| Turkey | B8 Erzurum: 20 km from Hinis to Pasinler, 1950 m, D. 46281! | 39.47840 | 41.77044 |
| Turkey | B9 Ağri: 15 km from Eleşkirt to Horasan, E. of Tahir Pass, 2200 m, D. 47188! | 39.86678 | 42.39035 |
| Turkey | Bitlis: Suphan Da., 2800 m, D. 24726! | 38.89064 | 42.79934 |
| Turkey | C9 Hakkari: Cilo Da. above Diz Deresi, 2440 m, D. 23989! | 37.54372 | 43.87332 |
| Poland | Duszatyn (Komańcza district, Sanok county), on the side of a tarmac road - the Kazimierz Sosnowski Trail (the main public hiking trail in the Bieszczady Mountains), 49°18’41.0’’N, 22°7’7.5’’E, alt. 486 masl, 11.07.2013, leg. J. Proćków | 49.31139 | 22.11875 |
| Poland | Strzebowiska - in a meadow, along a gravel road and on abandoned land, alt. 640 masl, 16.07.2007, leg. A. & M. Nobis | 49.18278 | 22.39944 |
| Poland | Strzebowiska - near the tracks of a disusted narrow-gauge railway, alt. 640 masl, 16.07.2007, leg. A. & M. Nobis | 49.18092 | 22.39736 |
| Poland | Strzebowiska - a rubble heap near buildings in the northern part of the village, alt. 620 masl, 18.07.2007, leg. M. Nobis | 49.18628 | 22.40122 |
| Poland | Strzebowiska - roadside escarpment, between the wood and buildings in the southern part of the village (close to a stream), alt. 680 masl, 17.07.2007, leg. M. Nobis | 49.17639 | 22.39650 |
| Poland | Strzebowiska - roadside and slope of a stream bank (near fencing) in the central part of the village, 16.07.2007, leg. A. & M. Nobis, M. Kozak | 49.17847 | 22.39842 |
| Poland | Strzebowiska - roadside and slope of a stream bank (near fencing) in the central part of the village, 16.07.2007, leg. A. & M. Nobis, M. Kozak | 49.17917 | 22.39881 |
| Poland | Strzebowiska - unused meadow on a slope, south of the railway tracks, 17.07.2007, leg. A. & M. Nobis, M. Kozak | 49.18014 | 22.39167 |
| Poland | Krzywe - side of the main road, alt. 580 masl, 19.07.2007, leg. A. & M. Nobis | 49.20239 | 22.36458 |
| Poland | Krzywe - fresh meadow and scrub edge, alt. 610 masl, 19.07.2007, leg. A. & M. Nobis, M. Kozak | 49.19858 | 22.36161 |
| Poland | Przysłup - an abandoned plot of land near the railway tracks, alt. 670 masl, 21.08.2007, leg. A. & M. Nobis | 49.18364 | 22.38972 |
